# Supplementary material for: Hypertension- and glycaemia-lowering effects of a grape-pomace-derived seasoning in high-cardiovascular risk and healthy subjects. Interplay with the gut microbiome
Source: Royal Society of Chemistry journal article supplement (doi:10.1039/d1fo03942c), 2022-01-01
Supplement: d1fo03942c6.pdf [file d1fo03942c6.pdf]

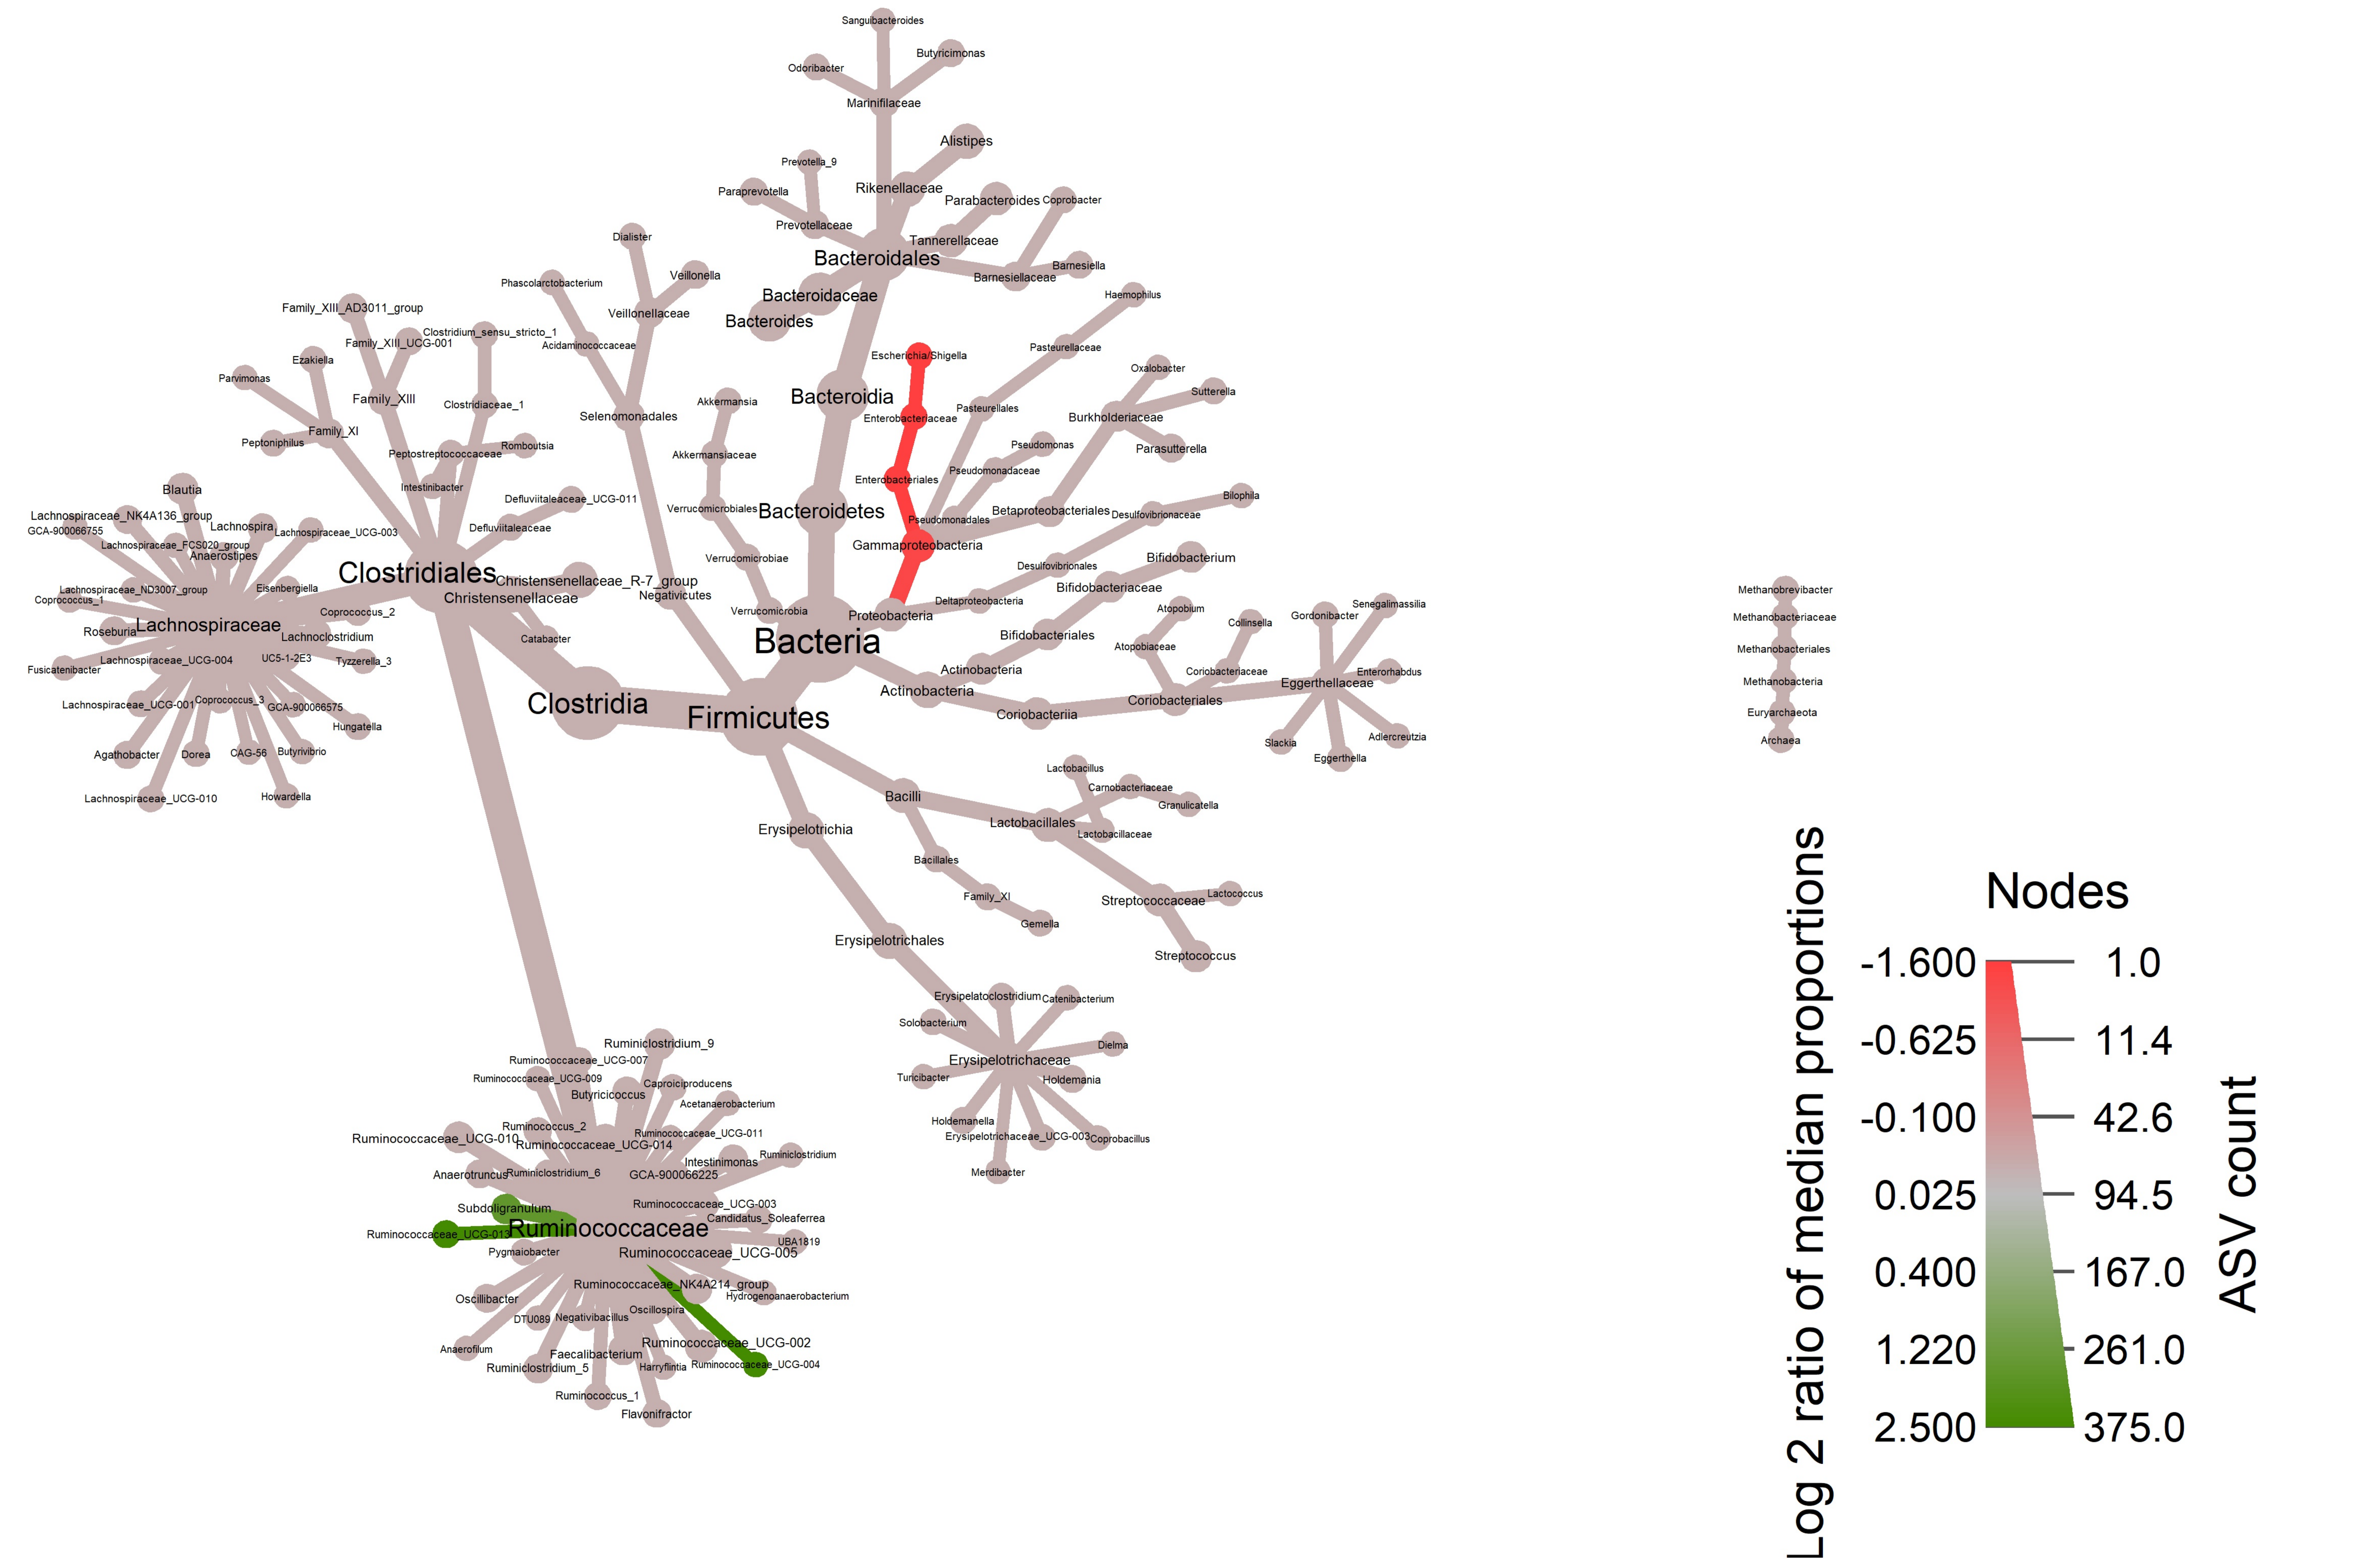

Methanobrevibacter  
Methanobacteriaceae  
Methanobacteriales  
Methanobacteria  
Euryarchaeota  
Archaea
