# Supplementary figures and images for: Hypertension- and glycaemia-lowering effects of a grape-pomace-derived seasoning in high-cardiovascular risk and healthy subjects. Interplay with the gut microbiome
Source: Royal Society of Chemistry journal article supplement (doi:10.1039/d1fo03942c), 2022-01-01

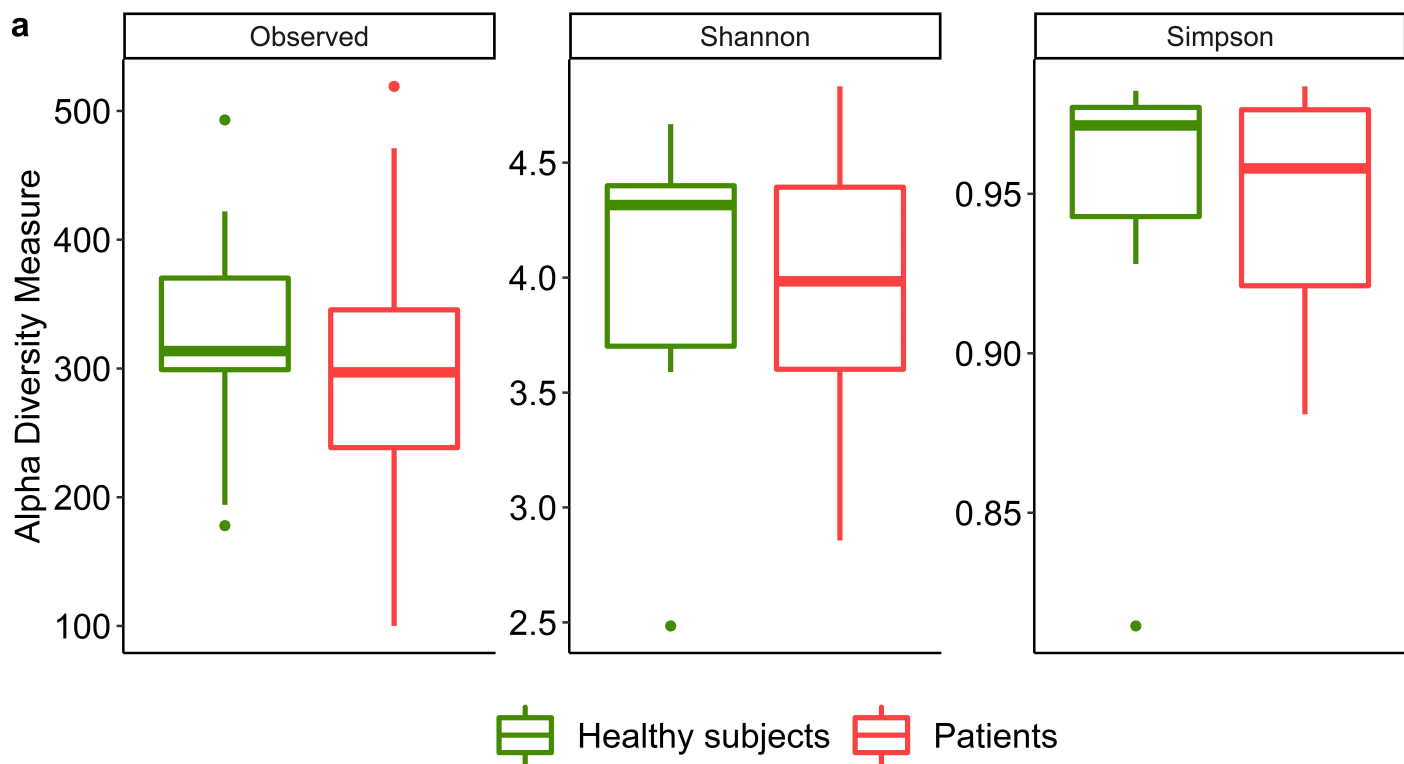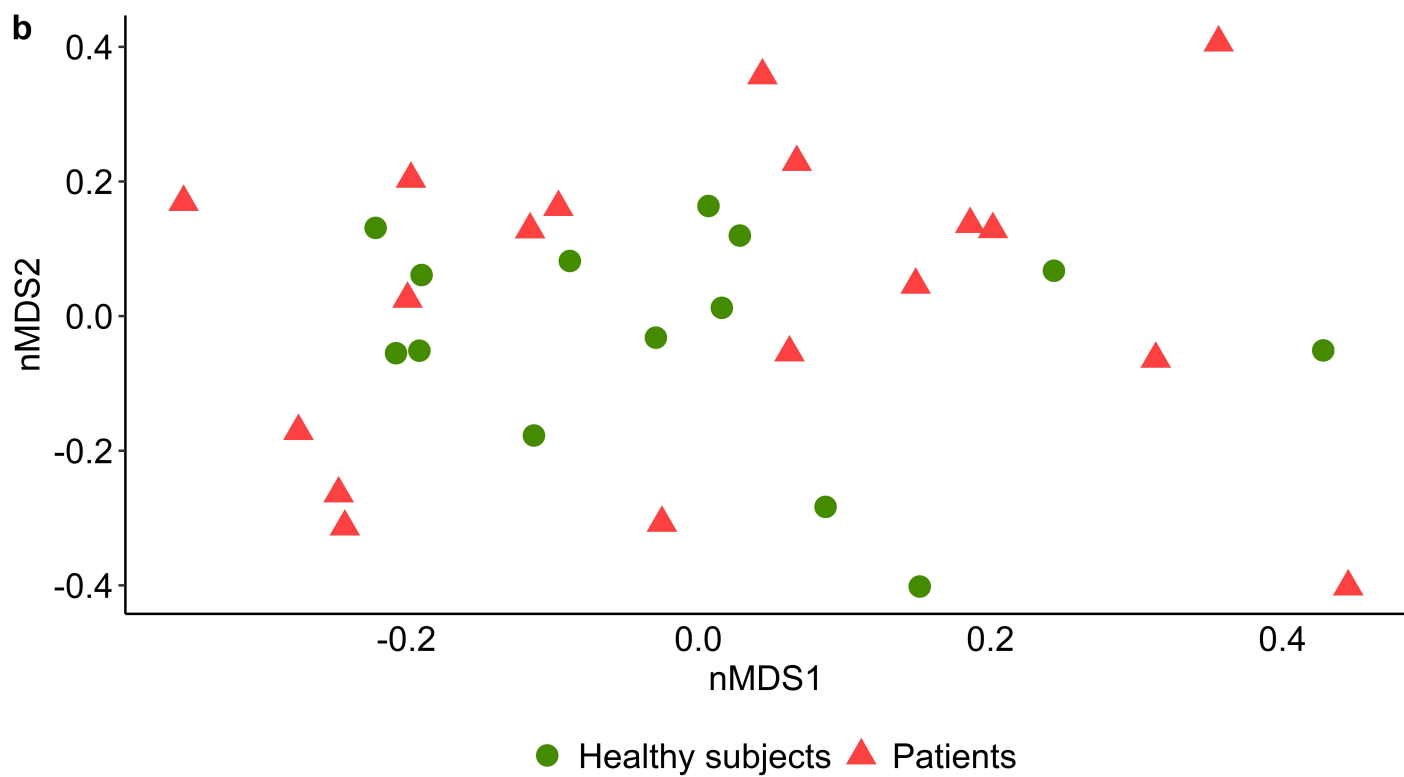

Supplement: d1fo03942c2.pdf [file d1fo03942c2.pdf]

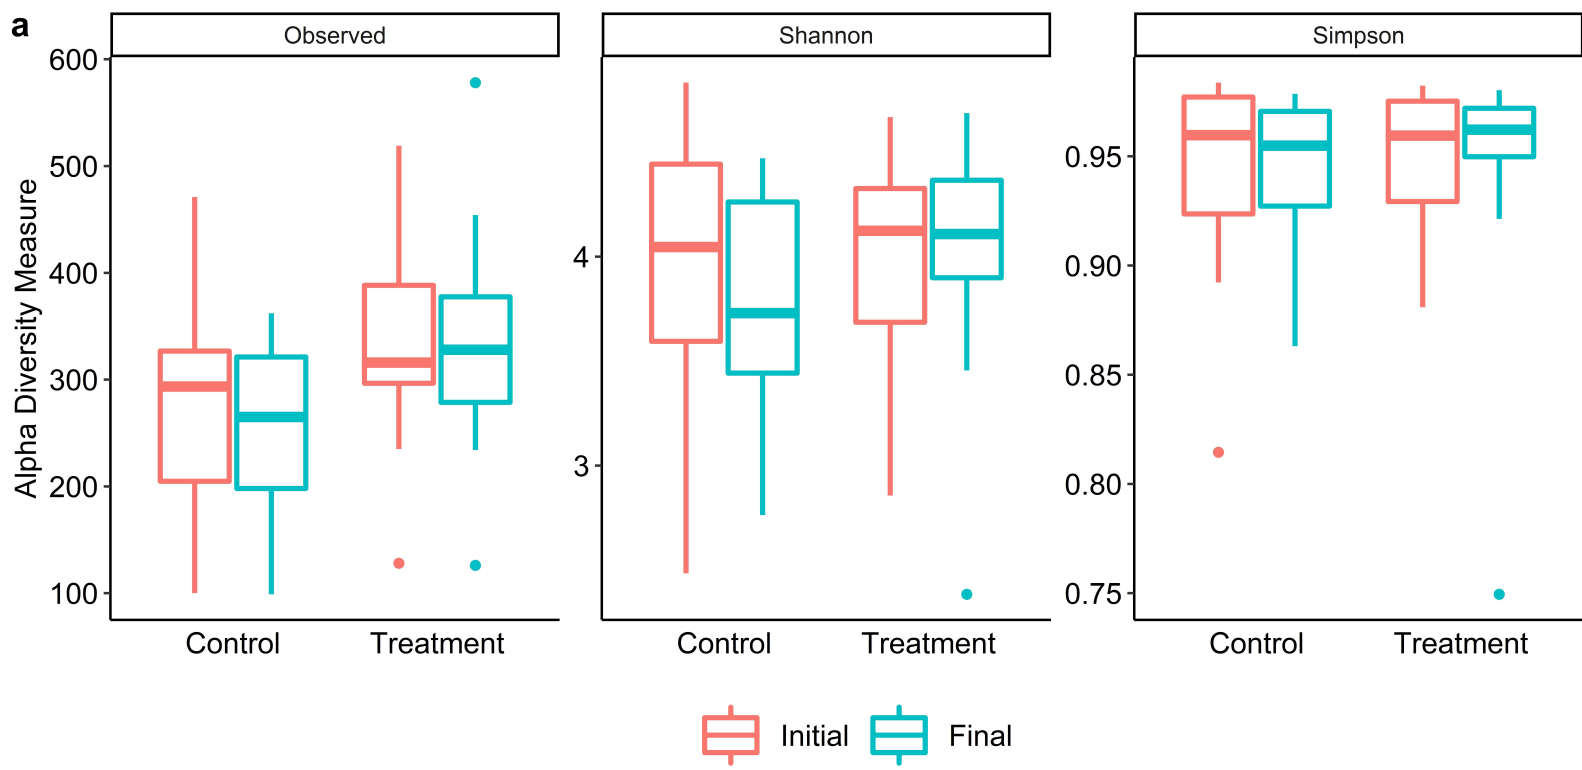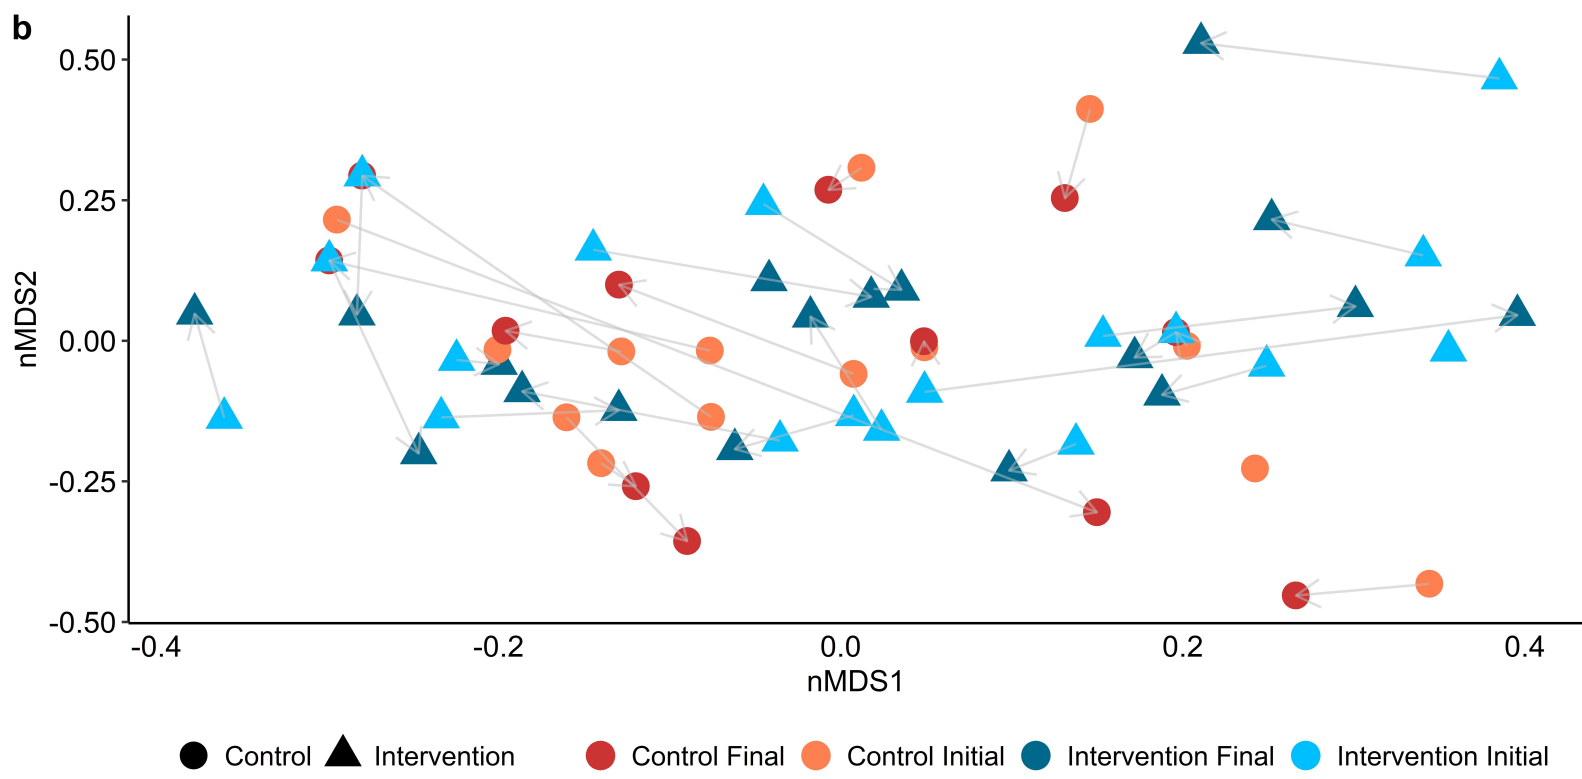

Supplement: d1fo03942c3.pdf [file d1fo03942c3.pdf]

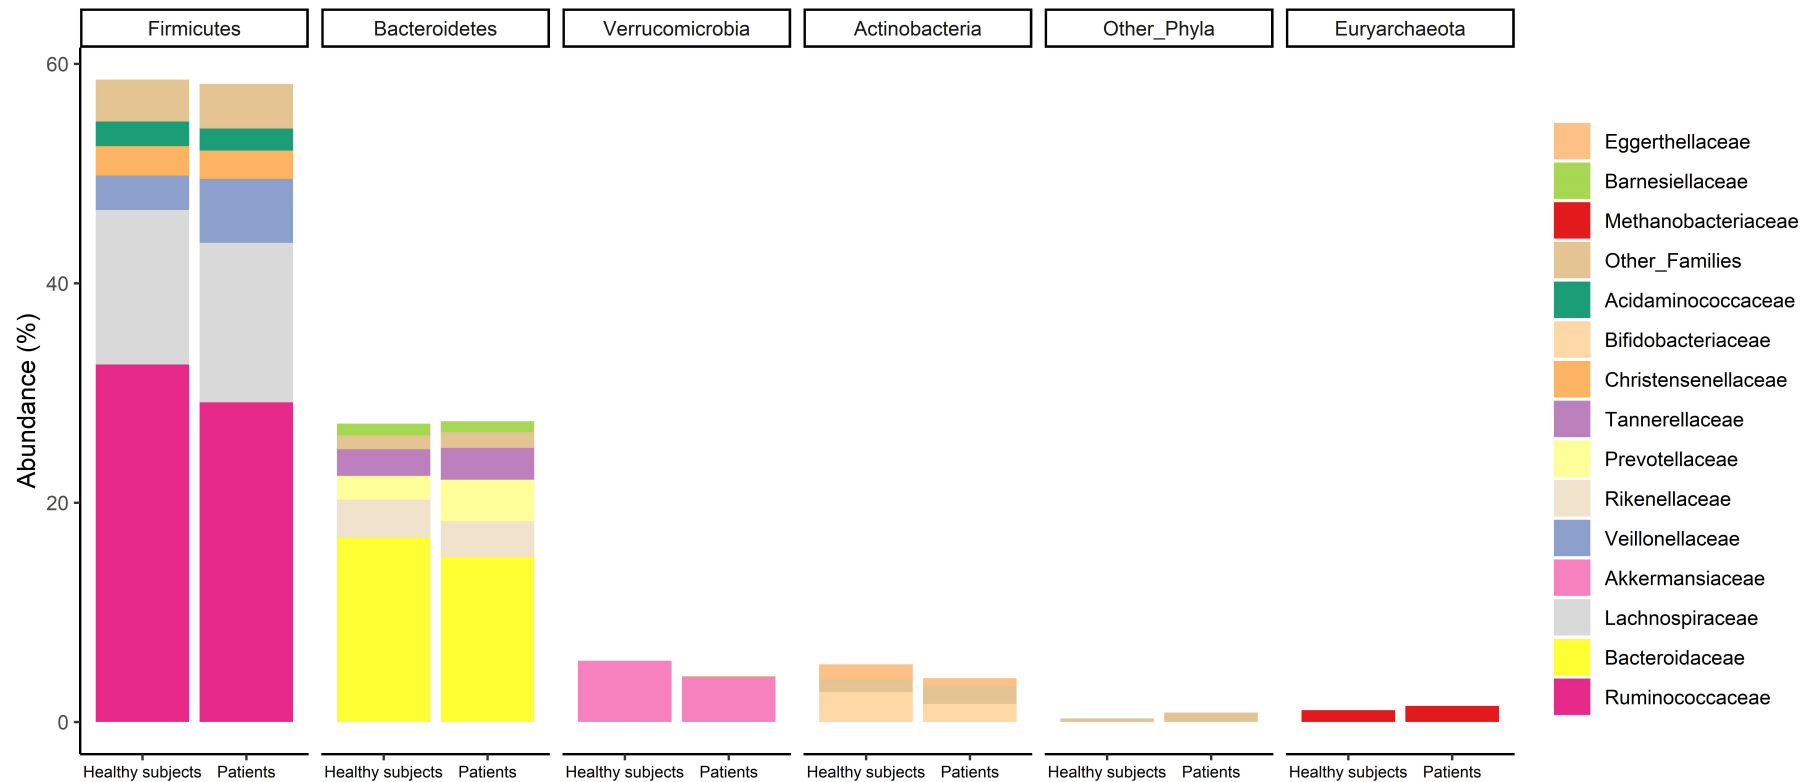

Supplement: d1fo03942c4.pdf [file d1fo03942c4.pdf]

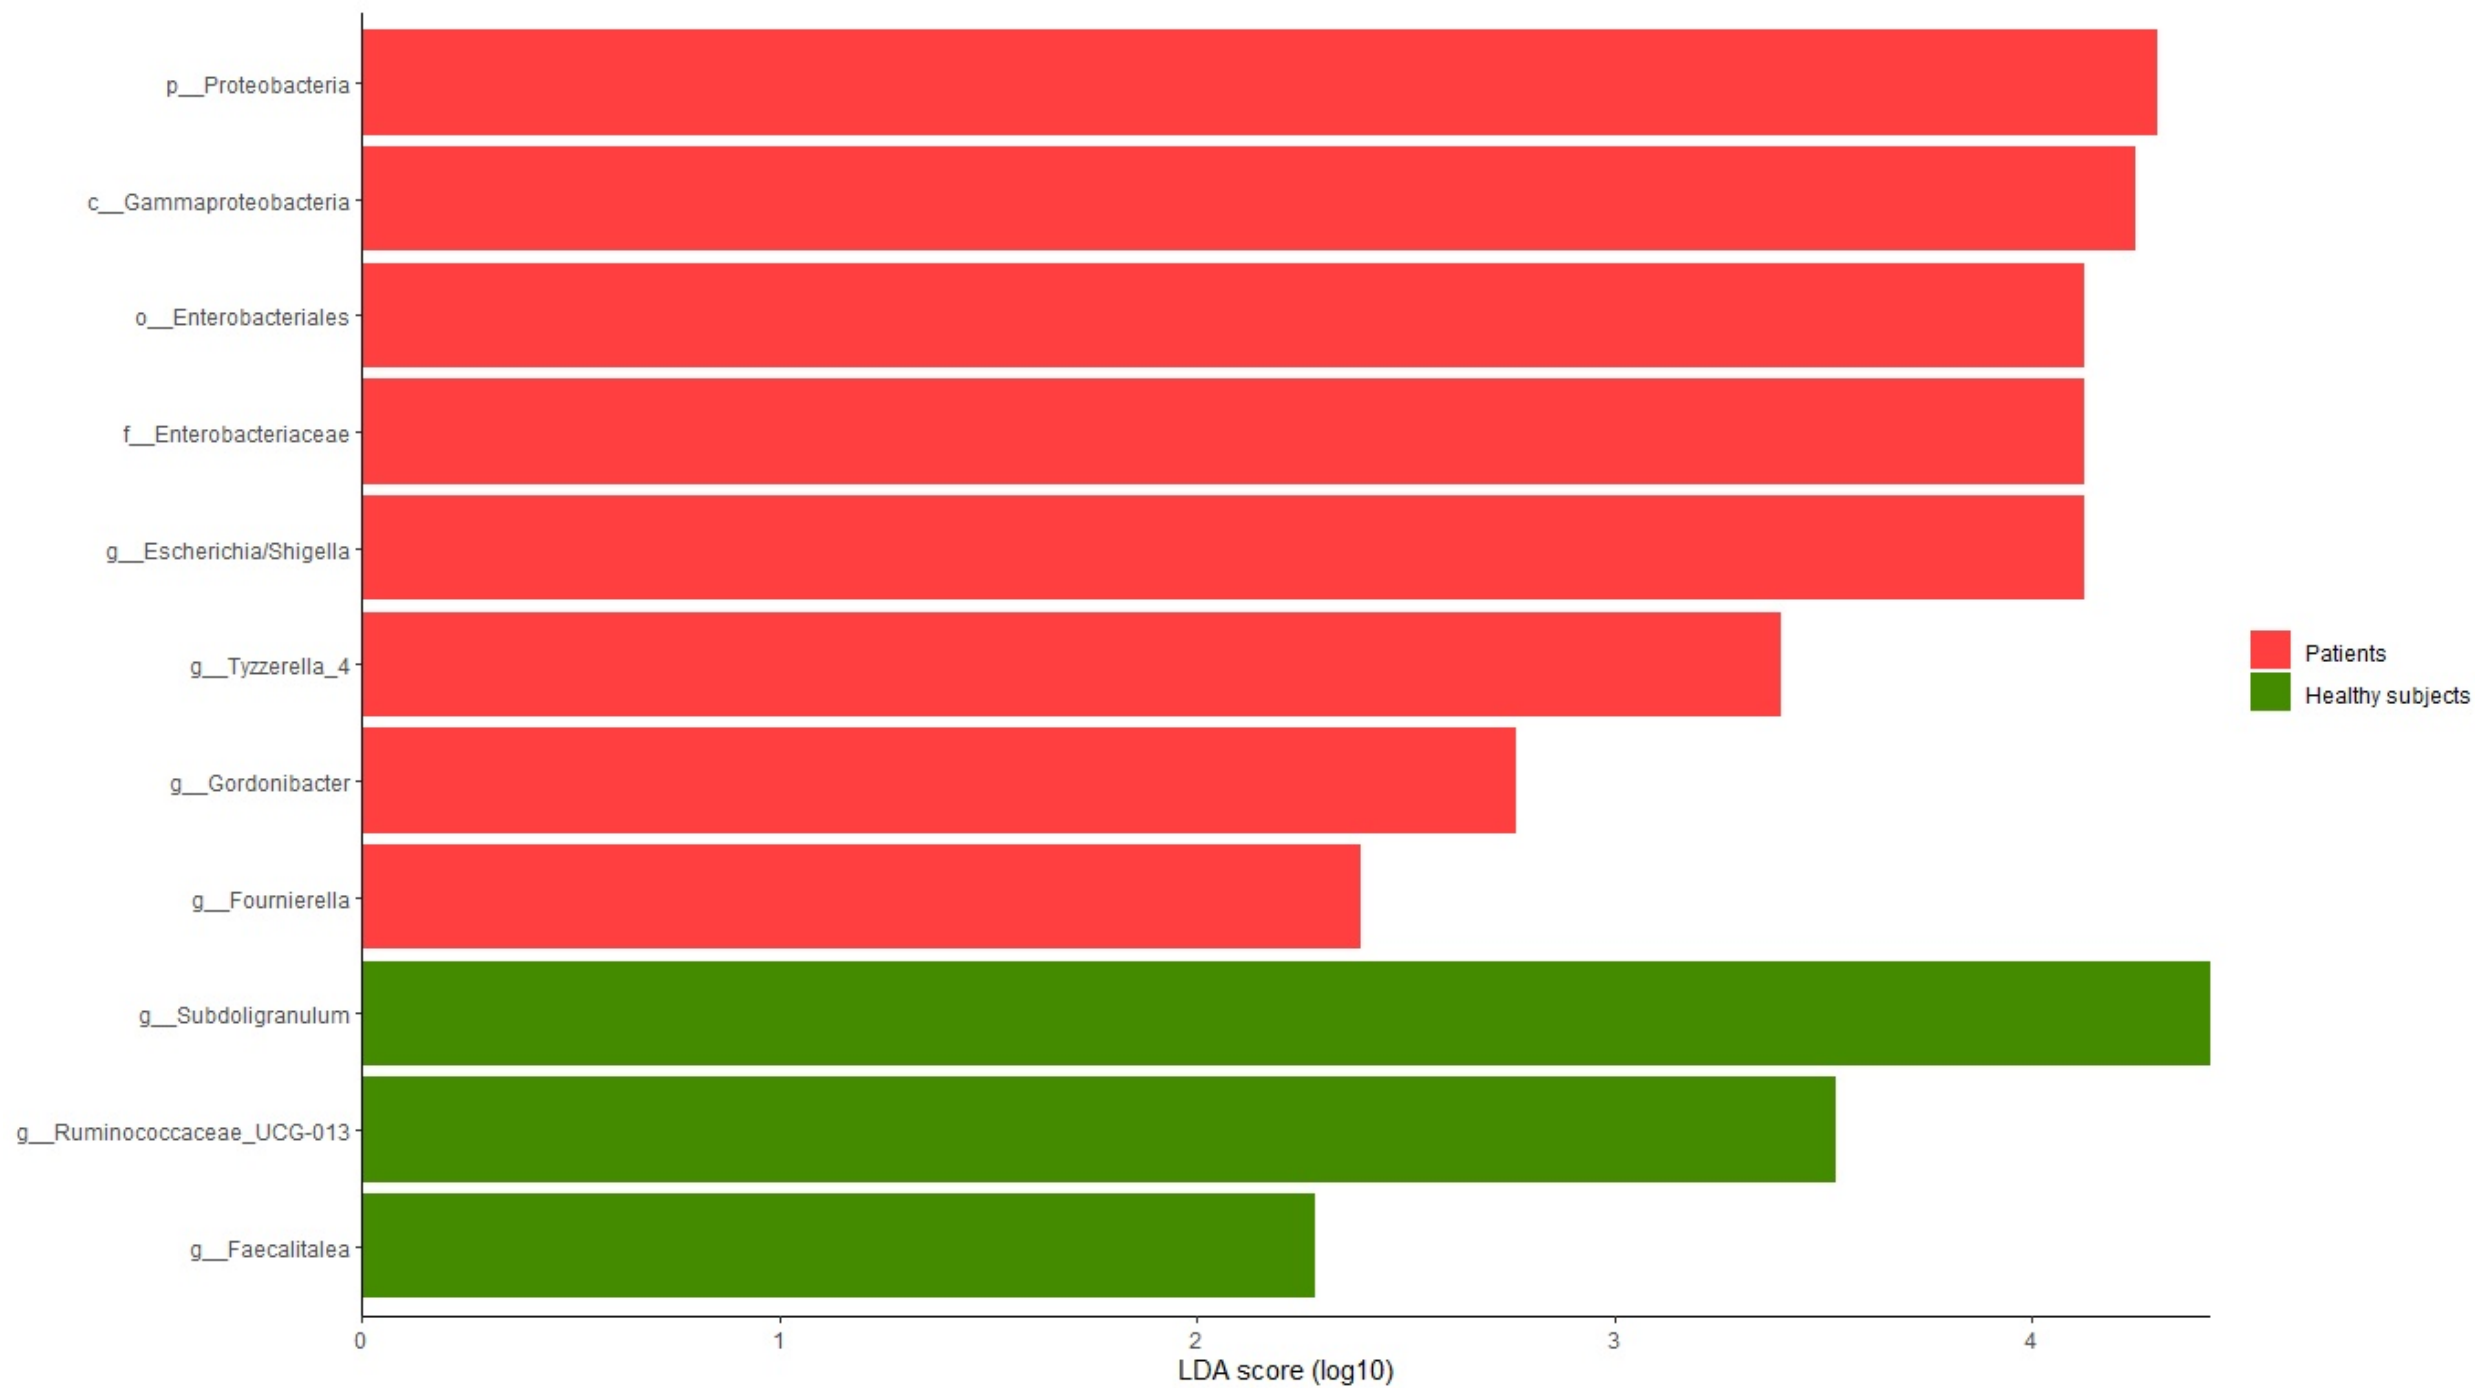

Supplement: d1fo03942c5.pdf [file d1fo03942c5.pdf]
